# Supplementary material for: Protein N-terminal acetylation is required for embryogenesis in Arabidopsis
Source: PubMed Central journal article supplement (PMC4973746; doi:10.1093/jxb/erw257), 2016-07-06
Supplement: supp_erw257_supplementary_table_S1_figures_S1_S4.pdf [file supp_erw257_supplementary_table_S1_figures_S1_S4.pdf]

## SUPPLEMENTARY DATA

**Supplemental Table S1. The primers used in this study.**

|                                                |                |                                           |
|------------------------------------------------|----------------|-------------------------------------------|
| <i>naa10-1</i>                                 | FP             | 5'-TGTGTCTTCCTGAGAACTACCAG-3'             |
|                                                | RP             | 5'-GCTGAGTTAAAGGTCCTGATTG-3'              |
|                                                | LB             | 5;-AACGTCCGCAATGTGTTATTAAG-3'             |
| <i>naa15-1</i>                                 | FP             | 5'-CCTTCTACACTATTGTGGACATTG-3'            |
|                                                | RP             | 5'-CACCTGATAGCTCTGATTGCTGC-3'             |
|                                                | LB             | 5'-GCTTCTATTATATCTTCCCAAATTACCAATACA-3'   |
| <i>naa15-3</i>                                 | FP             | 5'-CATTCCTCGTTTGCTTGTTTGTAG-3'            |
|                                                | RP             | 5'-CGACTGATTATCATTAAACGTAGAGAAC-3'        |
|                                                | LB             | 5'-GAAATGGATAAATAGCCTTGCTTCC-3'           |
| <i>Naa10-Myc,</i><br><i>Naa10-GFP</i>          | XbaI-FP        | 5'-GCTCTAGAATGGTTTGCATCAGGCGAG-3'         |
|                                                | RP-KpnI        | 5'-GGGGTACCTCATTGGAACTGCTTTACCATC-3'      |
| <i>Naa10-AD,</i><br><i>Naa10-BD</i>            | EcoRI-FP       | 5'-GGAATTCATGGTTTGCATCAGGCGAGC-3'         |
|                                                | RP-SmaI        | 5'-TCCCCCGGGTCATTTGGAACTGCTTTACCATCTAC-3' |
| <i>Naa15-AD,</i><br><i>Naa15-BD</i>            | EcoRI-FP       | 5'-GGAATTCATGGGGGCTTCGCTTCCTCC-3'         |
|                                                | RP-SmaI        | 5'-TCCCCCGGGTCAGGTTGCAACTGAGAGGCTC-3'     |
| <i>pNaa15::Naa15-Flag,</i><br><i>Naa15-YFP</i> | BamHI-Naa15    | 5'-CGGGATCCATGGGGGCTTCGCTTCCTCC-3'        |
|                                                | Naa15-SmaI     | 5'-TCCCCCGGGGTTGCAACTGAGAGGCTCTTG-3'      |
|                                                | SmaI-Flag      | 5'-TCCCCCGGGCTGCAGGAATTCGATATCAAGC-3'     |
|                                                | Flag-SacI      | 5'-CGAGCTCTTAAATTCGAGCTCTGTGACTG-3'       |
|                                                | HindIII-pNaa15 | 5'-CCCAAGCTT TTCTTATTGCACTGCTTC-3'        |
|                                                | pNaa15-BamHI   | 5'-CGGGATCC TTTATTGCGCTACTGAGAGAGCTC-3'   |

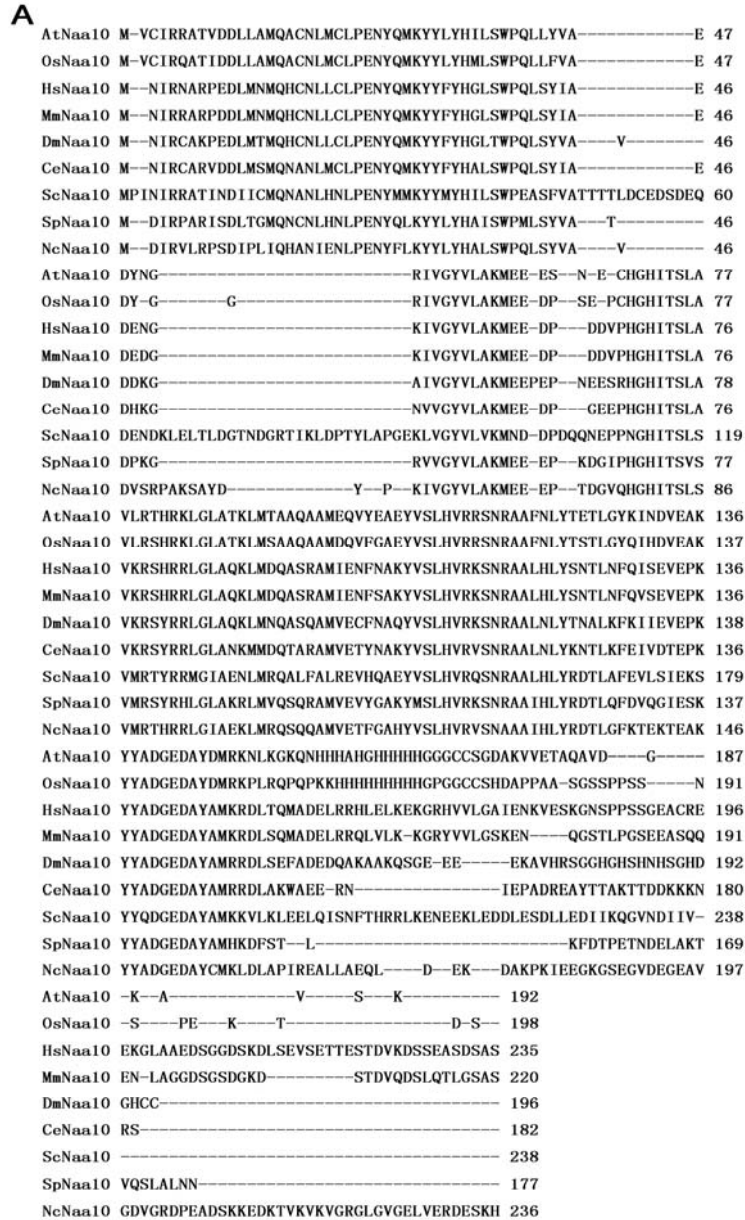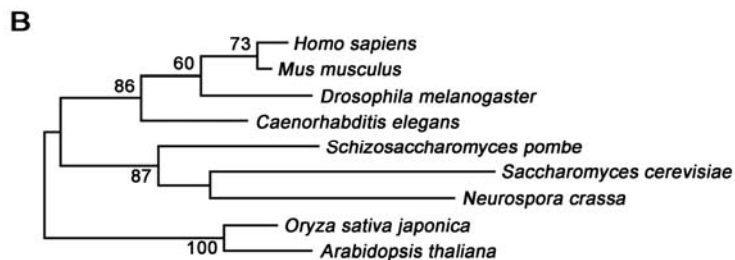

**Supplemental Figure S1. Naa10 is evolutionarily conserved among eukaryotes.**

(A) Amino acid sequence alignment of Naa10 orthologs from multiple taxa. The accessions of the Naa10 homologs are: *Homo sapiens*, NP\_003482; *Mus musculus*, BAB27052; *Drosophila melanogaster*, NP\_648378; *Caenorhabditis elegans*, NP\_501392; *Oryza sativa japonica*, NP\_001054011; *Arabidopsis thaliana*,

NP\_196882; *Schizosaccharomyces pombe*, NP\_594309; *Saccharomyces cerevisiae*, NP\_011877; and *Neurospora crassa*OR74A, XP\_011394752.

(B) The phylogenetic tree of the Naa10 homologs was constructed using the maximum-likelihood method with MEGA 6.



**Supplemental Figure S2. Naa15 is evolutionarily conserved among eukaryotes.**

(A) Amino acid sequence alignment of Naa10 orthologs from multiple taxa. The accessions of the Naa10 homologs are: *Homo sapiens*, NP\_476516; *Mus musculus*, NP\_444319; *Drosophila melanogaster*, NP\_573384; *Caenorhabditis elegans*, NP\_497180.3; *Oryza sativa japonica*, NP\_001043582; *Arabidopsis thaliana*, NP\_001185448; *Schizosaccharomyces pombe*, NP\_588160; *Saccharomyces cerevisiae*, AJU80945; and *Neurospora crassa*OR74A, XP\_962452.

(B) The phylogenetic tree of the Naa15 homologs was constructed using the maximum-likelihood method with MEGA 6.

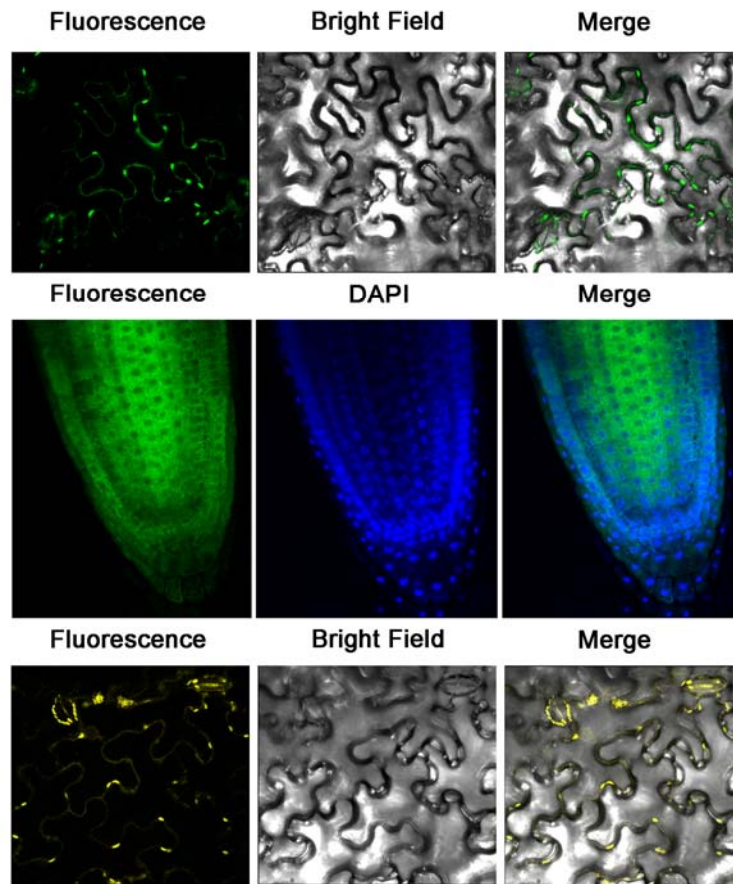

**Supplemental Figure S3. Subcellular localization of Naa10 and Naa15 in *N. benthamiana* and root of transgenic *Arabidopsis*.**

The *Naa10* and *Naa15* CDSs were fused to GFP and YFP, respectively, driven by the 35S promoter, and cloned into pCambia1300. Naa10-GFP or Naa15-YFP was expressed in *N. benthamiana* leaf epidermal cells (top panel and bottom panel, respectively), *p35S::Naa10-GFP* was transformed into *Arabidopsis* (middle panel). The subcellular localization of Naa10-GFP or Naa15-YFP was observed by confocal laser scanning microscopy..

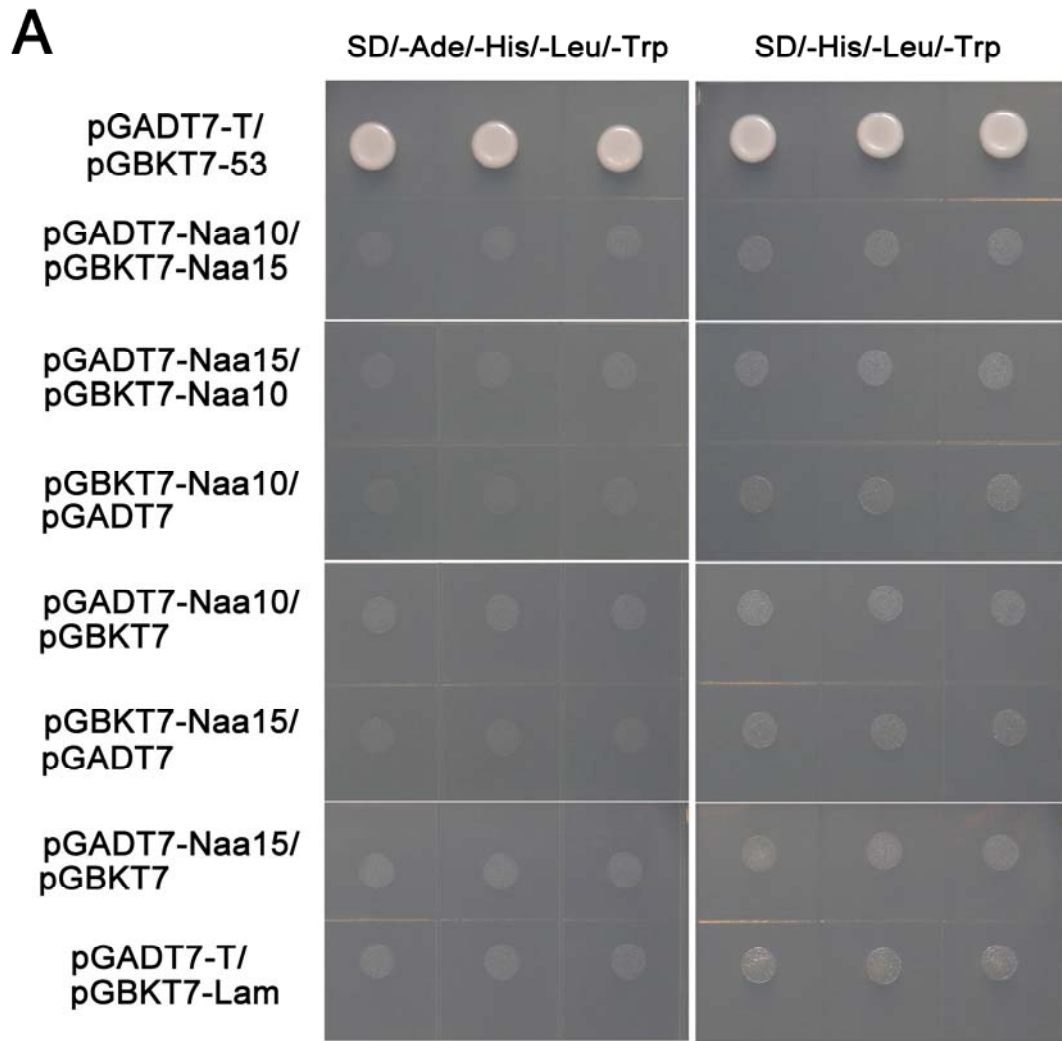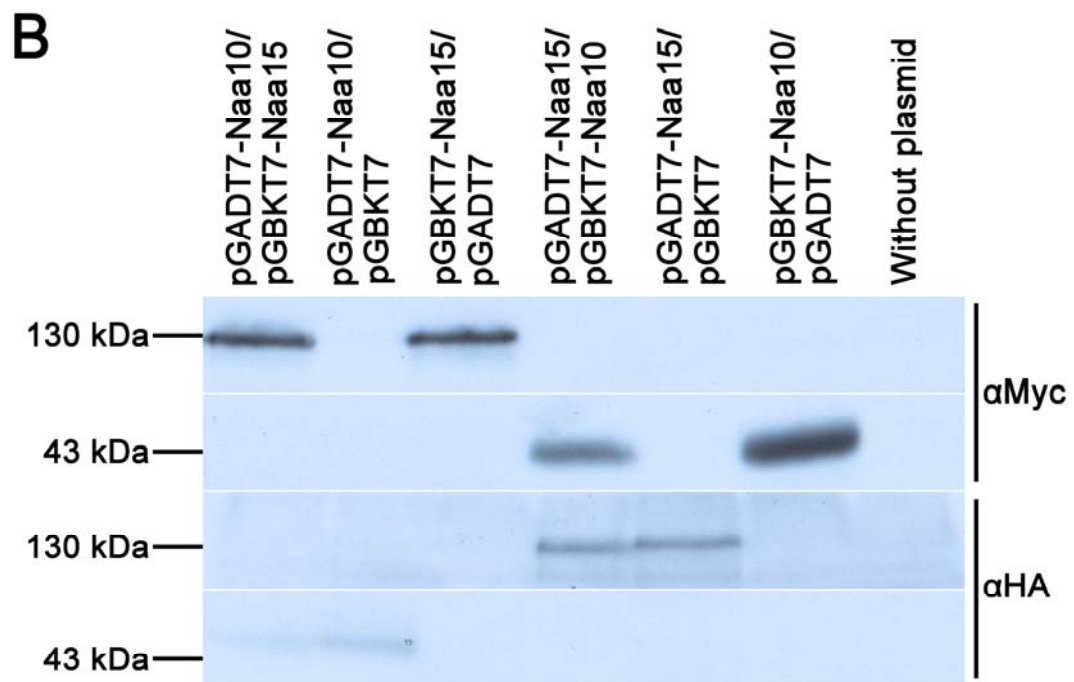

Supplemental Figure S4. No physical interaction was detected between Naa10

**and Naa15 in a yeast two-hybrid assay.**

(A) There was no physical interaction between Naa10 and Naa15 in yeast. Positive control: pGADT7-T/pGBKT7-53; negative control: pGADT7-T/pGBKT7-Lam. The interaction between Naa10 and Naa15 was assessed by growth on SD/-His/-Leu/-Trp and SD/-Ade/-His/-Leu/-Trp media.

(B) Both Naa10 and Naa15 were expressed in yeast. HA-specific antibodies were used to detect the proteins expressed as a fusion to an HA epitope tag from pGADT7. c-Myc-specific antibodies were used to detect the proteins expressed as a fusion with the c-Myc epitope tag from pGBKT7. AH109 cells without plasmid transformation were used as a negative control.
